# Supplementary material for: Hydrogen-Bonded Chain of Rings Motif in N-(4-Methoxyphenyl)piperazin-1-ium Salts with Benzoate Anions: Supramolecular Assemblies and Their Energy Frameworks
Source: MDPI journal article supplement (doi:10.3390/cryst12121807), 2022-12-12
Supplement: s1 [file s1]

Sample Code: D1

Solvent: CD3OD

SA-Varian 400MHz NMR

Date: Jul 18 2022

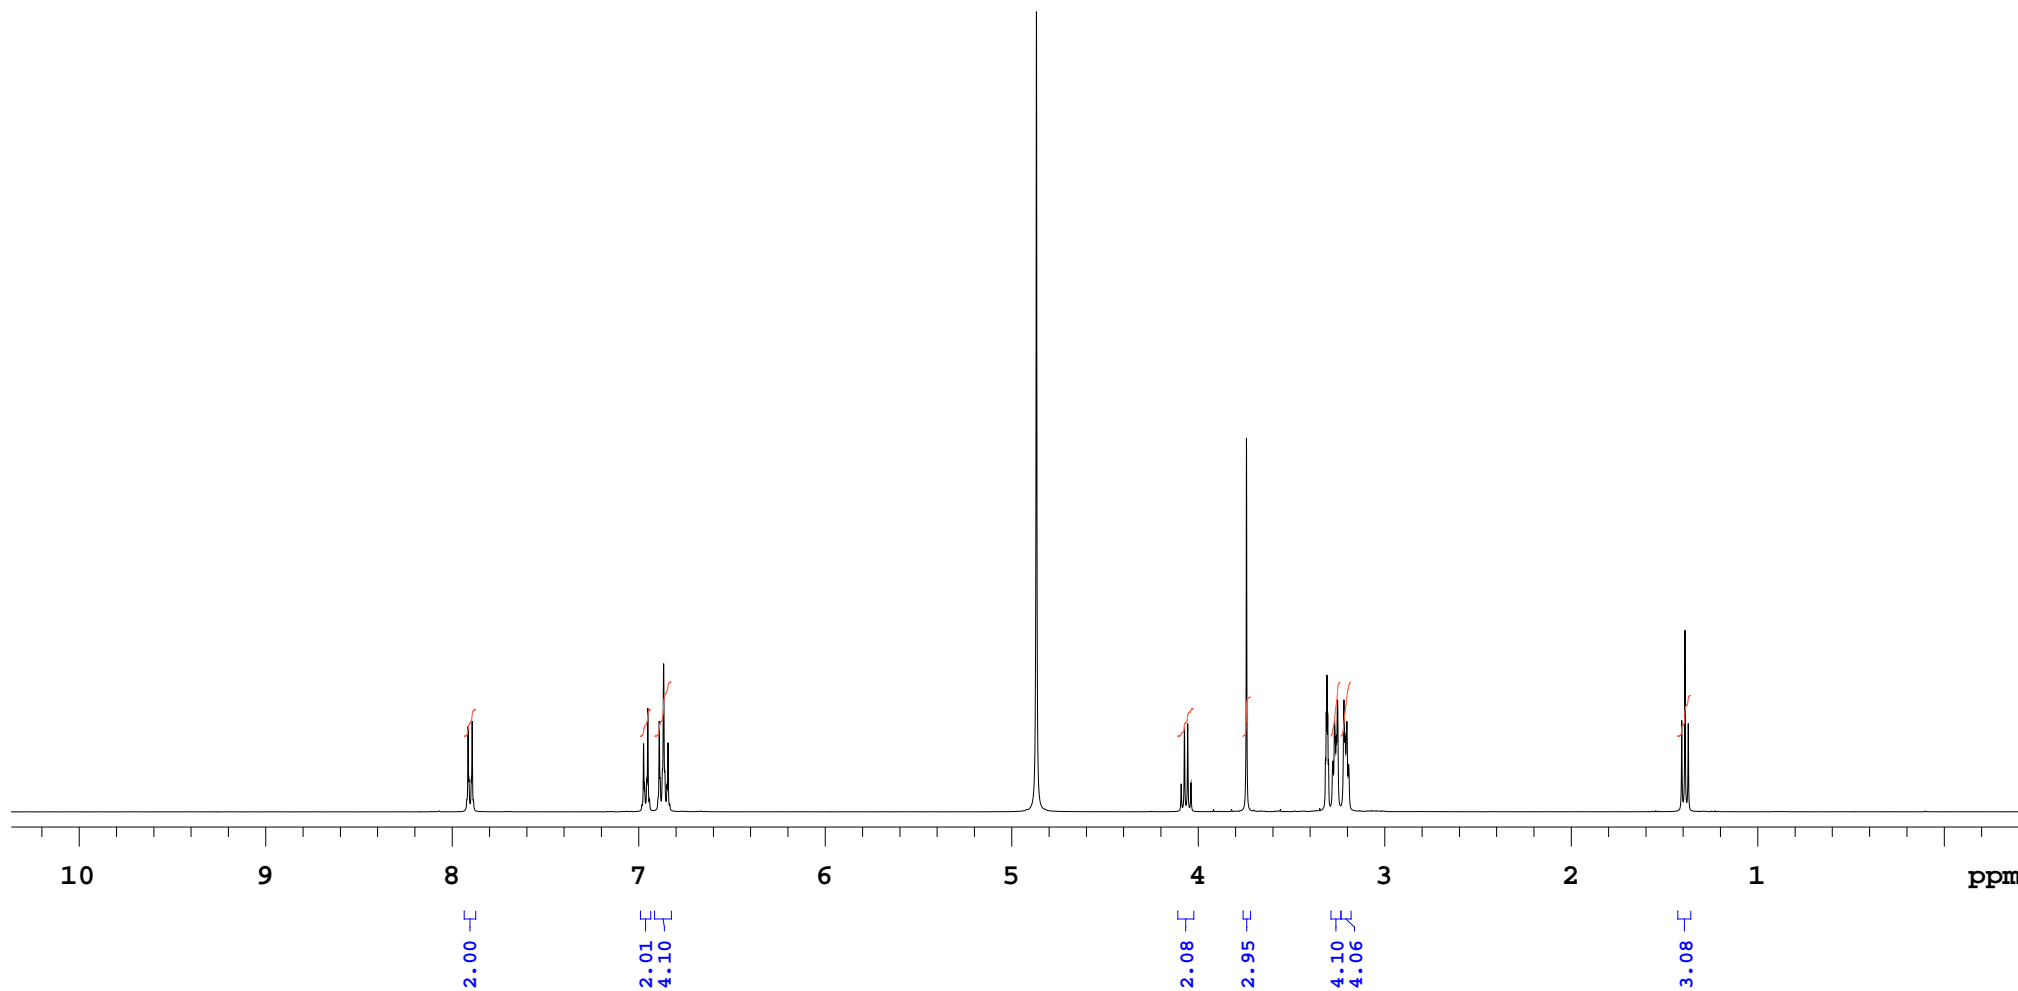

Plotname: D1\_PROTON\_20220718\_01\_plot01

Sample Code: D1

Solvent: CD<sub>3</sub>OD

SA-Varian 400MHz NMR

Date: Jul 18 2022

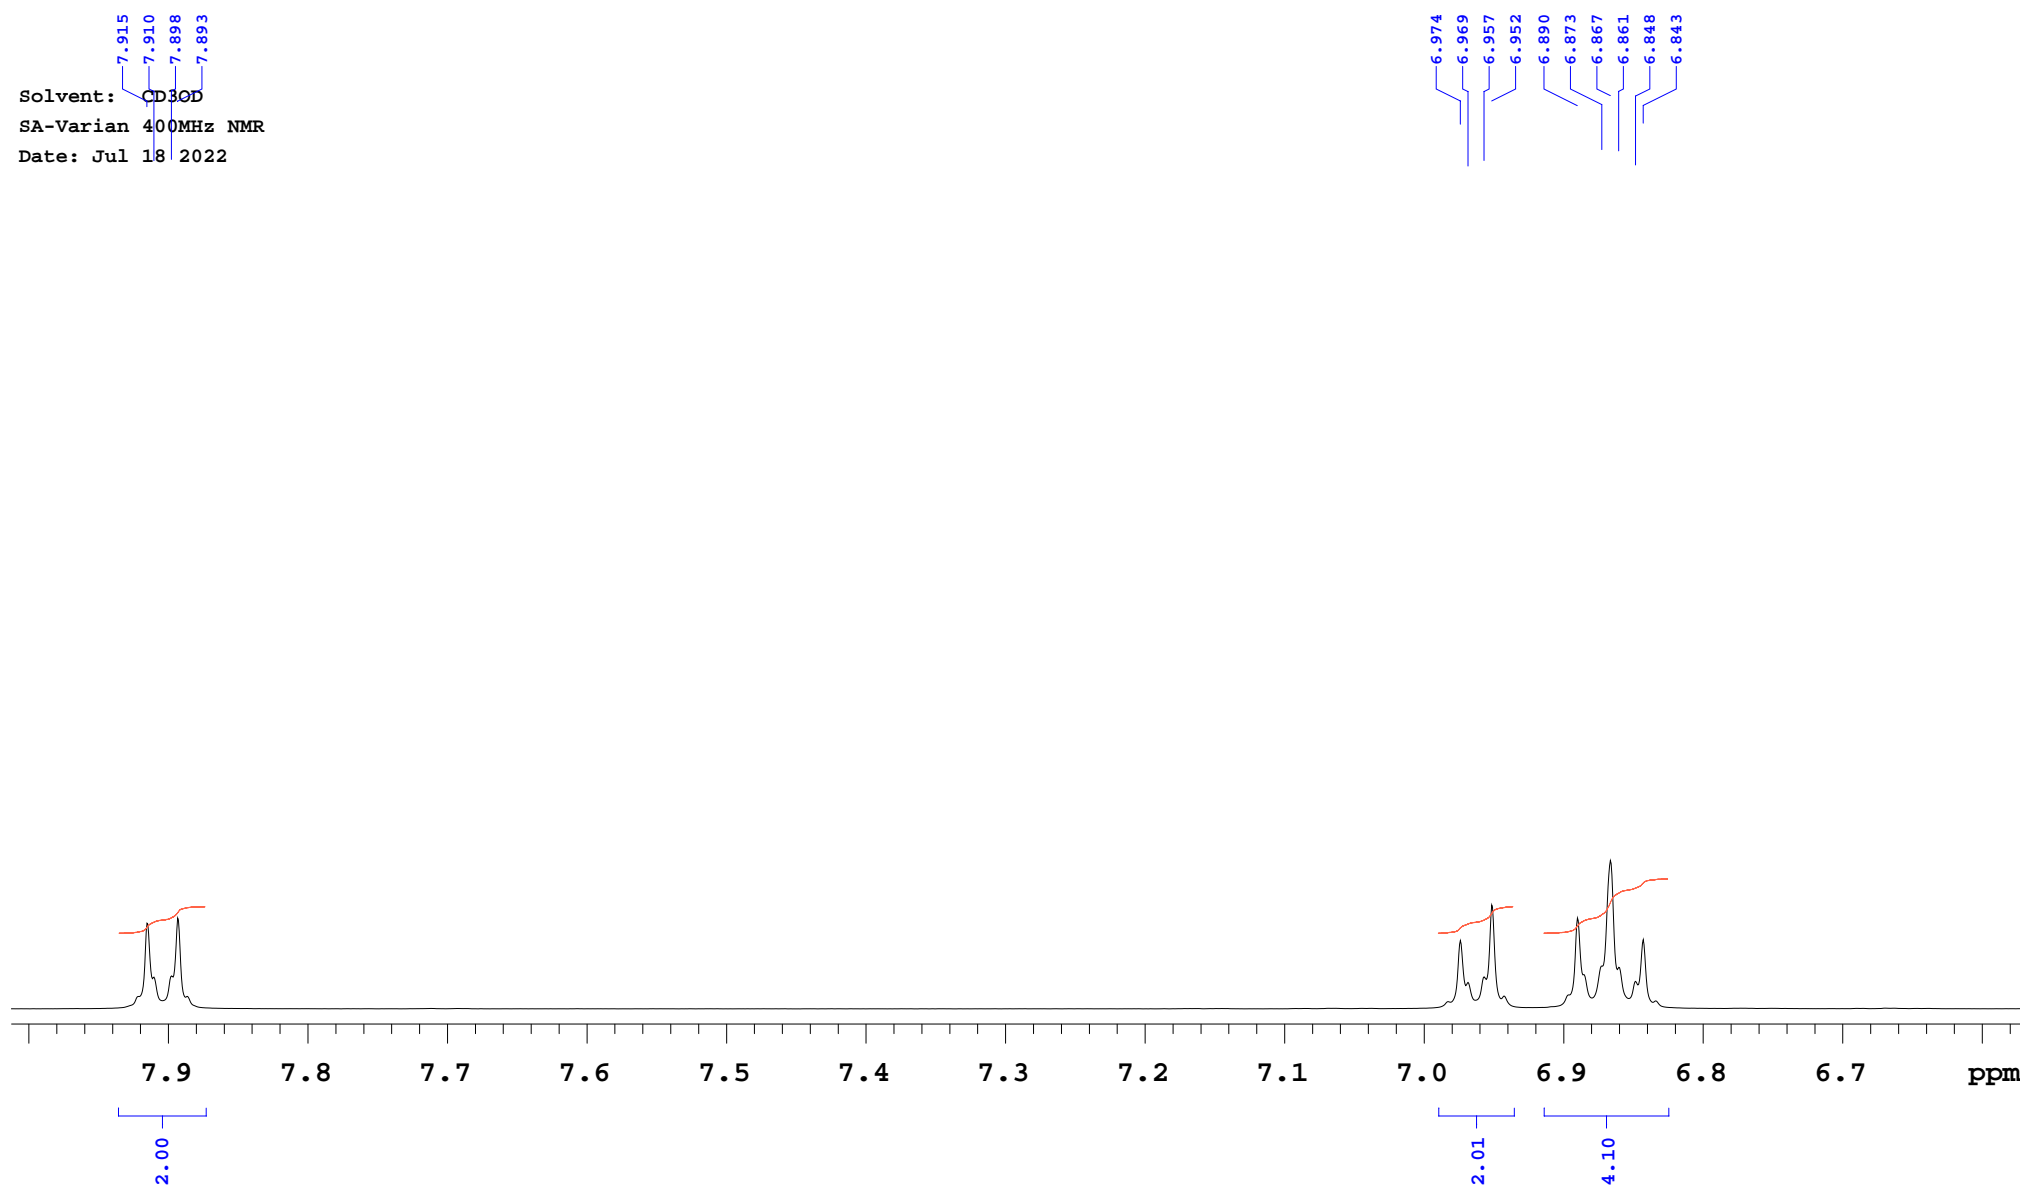

Plotname: D1\_PROTON\_20220718\_01\_plot02

Sample Code: D1

Solvent: CD3OD

SA-Varian 400MHz NMR

Date: Jul 18 2022

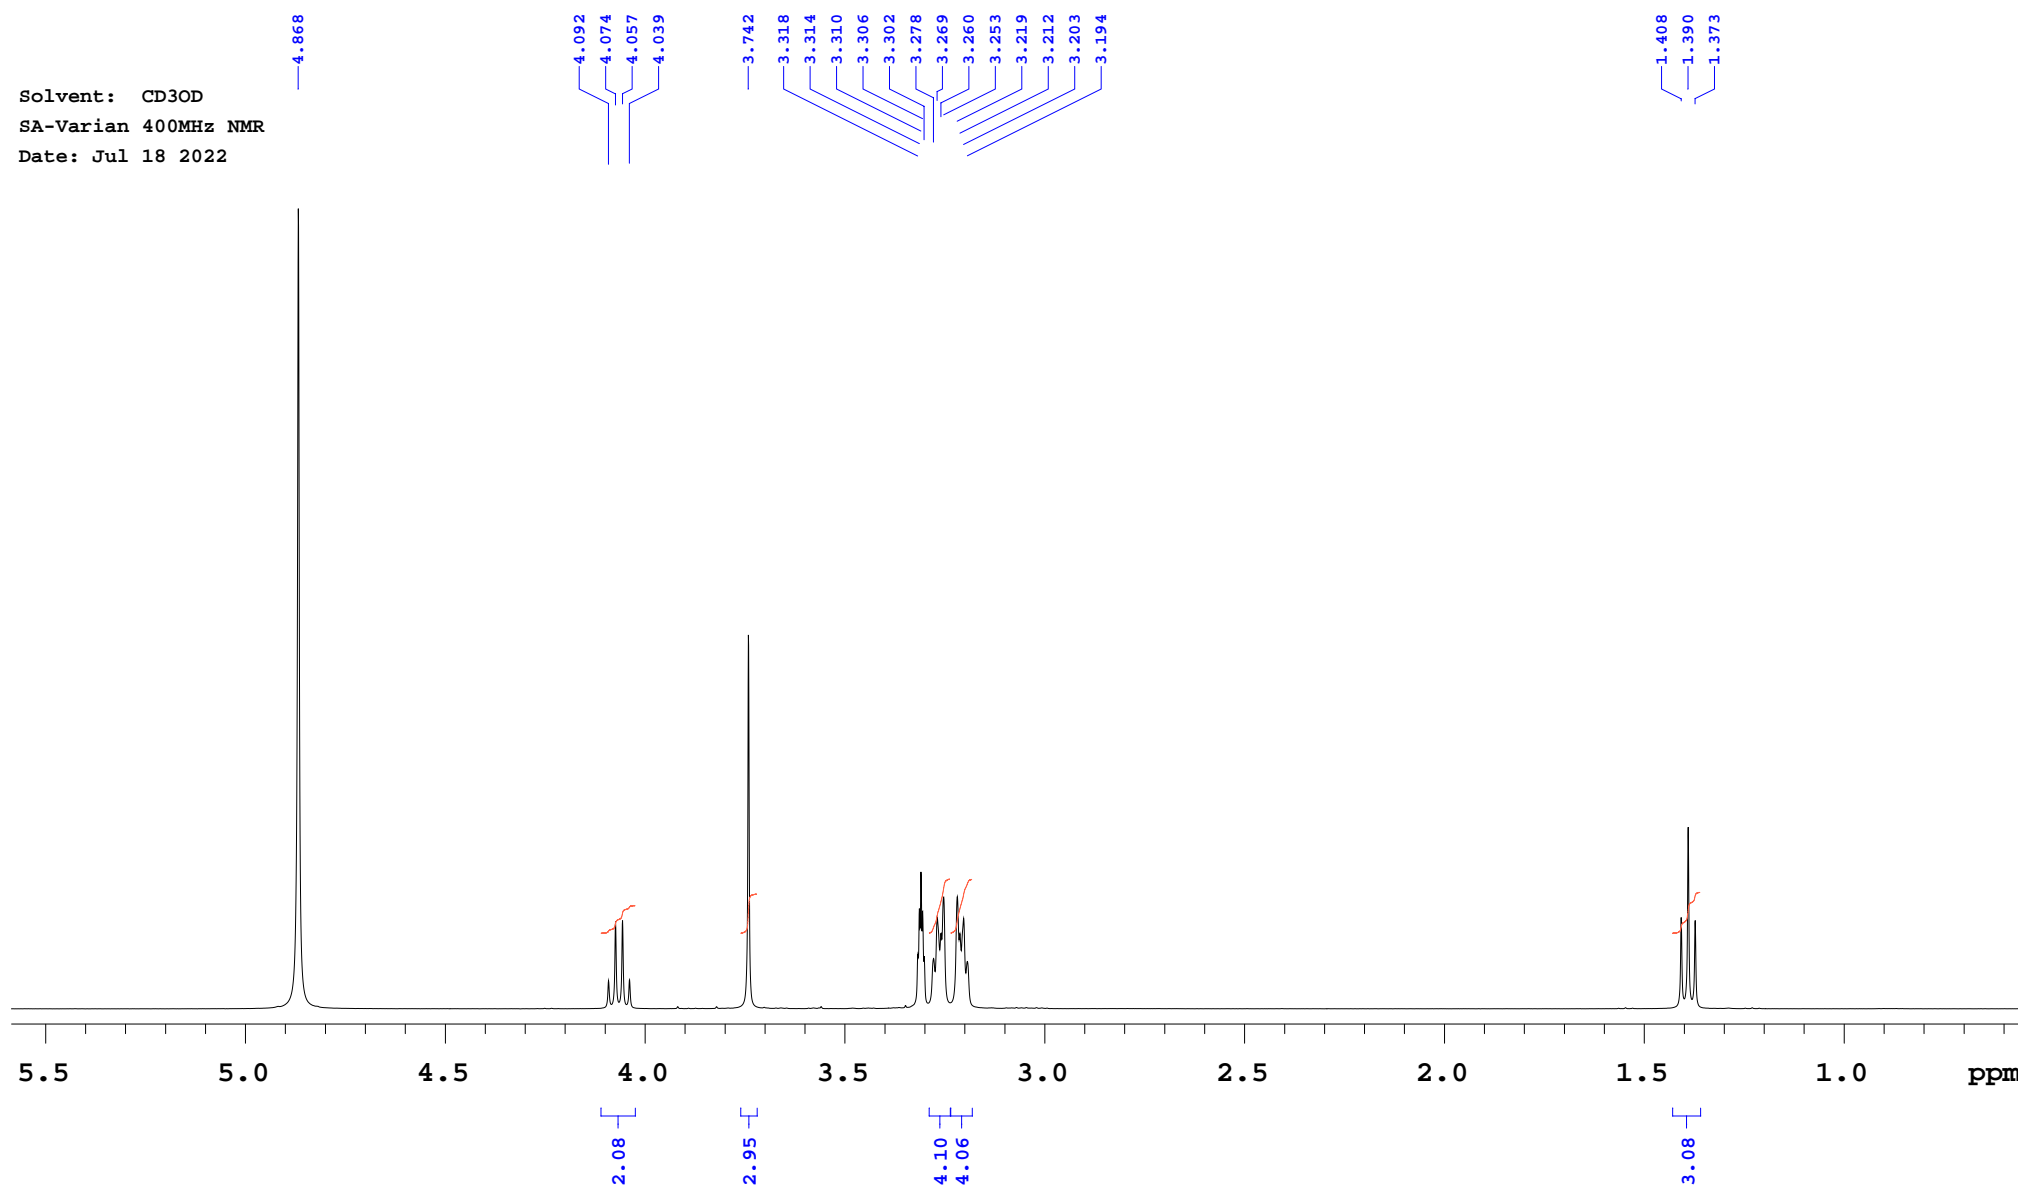

Plotname: D1\_PROTON\_20220718\_01\_plot03

exp254 PROTON

| SAMPLE              |                | PRESATURATION |          |
|---------------------|----------------|---------------|----------|
| date                | Jul 18 2022    | satmode       | n        |
| solvent             | CD3OD          | wet           | n        |
| file                | /home/spark/d~ | SPECIAL       |          |
| ata/2022/Jul/D1_20~ |                | temp          | 25.0     |
| 220718_01/D1_PROTO~ |                | gain          | 36       |
| N_20220718_01.fid   |                | spin          | 20       |
| ACQUISITION         |                | hst           | 0.008    |
| sw                  | 7183.9         | pw90          | 12.200   |
| at                  | 4.000          | alfa          | 10.000   |
| np                  | 57472          | FLAGS         |          |
| fb                  | 4000           | il            | n        |
| bs                  | 2              | in            | n        |
| d1                  | 1.000          | dp            | y        |
| nt                  | 512            | hs            | nn       |
| ct                  | 14             | PROCESSING    |          |
| TRANSMITTER         |                | lb            | 0.50     |
| tn                  | H1             | fn            | not used |
| sfrq                | 399.691        | DISPLAY       |          |
| tof                 | 799.3          | sp            | -791.6   |
| tpwr                | 61             | wp            | 7183.7   |
| pw                  | 6.100          | rfl           | 2114.7   |
| DECOUPLER           |                | rfp           | 1323.0   |
| dn                  | C13            | rp            | -31.8    |
| dof                 | 0              | lp            | 0        |
| dm                  | nnn            | PLOT          |          |
| decwave             | W40_GATB-0~    | wc            | 268      |
|                     | 12             | sc            | 0        |
| dpwr                | 34             | vs            | 97       |
| dmf                 | 29412          | th            | 3        |
|                     | ai             | cdc           | ph       |

| INDEX | FREQUENCY | PPM   | HEIGHT | INDEX | FREQUENCY | PPM   | HEIGHT |
|-------|-----------|-------|--------|-------|-----------|-------|--------|
| 1     | 3163.7    | 7.915 | 11.3   | 33    | 1276.5    | 3.194 | 6.3    |
| 2     | 3161.7    | 7.910 | 4.2    | 34    | 562.7     | 1.408 | 12.1   |
| 3     | 3156.7    | 7.898 | 4.4    | 35    | 555.6     | 1.390 | 24.0   |
| 4     | 3154.9    | 7.893 | 12.0   | 36    | 548.6     | 1.373 | 11.7   |
| 5     | 2787.5    | 6.974 | 9.0    |       |           |       |        |
| 6     | 2785.3    | 6.969 | 3.5    |       |           |       |        |
| 7     | 2780.7    | 6.957 | 4.2    |       |           |       |        |
| 8     | 2778.5    | 6.952 | 13.7   |       |           |       |        |
| 9     | 2753.9    | 6.890 | 12.0   |       |           |       |        |
| 10    | 2746.9    | 6.873 | 5.7    |       |           |       |        |
| 11    | 2744.5    | 6.867 | 19.6   |       |           |       |        |
| 12    | 2742.1    | 6.861 | 5.5    |       |           |       |        |
| 13    | 2737.3    | 6.848 | 3.6    |       |           |       |        |
| 14    | 2735.1    | 6.843 | 9.2    |       |           |       |        |
| 15    | 1945.6    | 4.868 | 105.9  |       |           |       |        |
| 16    | 1635.4    | 4.092 | 3.7    |       |           |       |        |
| 17    | 1628.4    | 4.074 | 11.6   |       |           |       |        |
| 18    | 1621.3    | 4.057 | 11.7   |       |           |       |        |
| 19    | 1614.3    | 4.039 | 3.8    |       |           |       |        |
| 20    | 1495.5    | 3.742 | 49.5   |       |           |       |        |
| 21    | 1326.0    | 3.318 | 7.2    |       |           |       |        |
| 22    | 1324.5    | 3.314 | 13.3   |       |           |       |        |
| 23    | 1323.0    | 3.310 | 18.1   |       |           |       |        |
| 24    | 1321.2    | 3.306 | 12.9   |       |           |       |        |
| 25    | 1319.7    | 3.302 | 7.0    |       |           |       |        |
| 26    | 1310.3    | 3.278 | 6.7    |       |           |       |        |
| 27    | 1306.7    | 3.269 | 12.1   |       |           |       |        |
| 28    | 1302.8    | 3.260 | 10.0   |       |           |       |        |
| 29    | 1300.2    | 3.253 | 14.8   |       |           |       |        |
| 30    | 1286.6    | 3.219 | 14.8   |       |           |       |        |
| 31    | 1283.9    | 3.212 | 10.0   |       |           |       |        |
| 32    | 1280.2    | 3.203 | 12.0   |       |           |       |        |

Plotname: D1\_PROTON\_20220718\_01\_plot04
