# Supplementary material for: Hydrogen-Bonded Chain of Rings Motif in N-(4-Methoxyphenyl)piperazin-1-ium Salts with Benzoate Anions: Supramolecular Assemblies and Their Energy Frameworks
Source: MDPI journal article supplement (doi:10.3390/cryst12121807), 2022-12-12
Supplement: s1 [file s1]

## SUPPLEMENTARY MATERIALS

# Hydrogen-bonded chain of rings motif in *N*-(4-methoxyphenyl)piperazin-1-ium salts with benzoate anions: supramolecular assemblies and their energy frameworks

Prabhakar Priyanka <sup>1</sup>, Bidarur K. Jayanna <sup>1</sup>, Thayamma R. Divakara <sup>2</sup>, Gejjalagere P. Suresha <sup>3</sup>, Vinaya <sup>4</sup>, Yeriur B. Basavaraju <sup>4</sup>, Hemmige S. Yathirajan <sup>4</sup>, Sean R. Parkin <sup>5</sup> and Lilianna Chęcińska <sup>6,\*</sup>

<sup>1</sup> Department of Chemistry, B.N.M. Institute of Technology, Bengaluru 560 070, India;

<sup>2</sup> T. John Institute of Technology, Bengaluru 560 083, India;

<sup>3</sup> Honeychem Pharma Research Pvt. Ltd., Peenya Industrial Area, Bengaluru 560 058, India;

<sup>4</sup> Department of Studies in Chemistry, University of Mysore, Manasagangotri, Mysuru 570 006, India;

<sup>5</sup> Department of Chemistry, University of Kentucky, Lexington, KY 40506, USA;

<sup>6</sup> Faculty of Chemistry, University of Lodz, Pomorska 163/165, 90-236 Łódź, Poland;

\* Correspondence: [lilianna.checinska@chemia.uni.lodz.pl](mailto:lilianna.checinska@chemia.uni.lodz.pl)

### Table of contents

| Table/Figure | Title                                                                                                                                       | Page |
|--------------|---------------------------------------------------------------------------------------------------------------------------------------------|------|
| Table S1.    | Geometry of C—H... $\pi$ (arene) intermolecular interactions for (I) – (III).                                                               | 2    |
| Figure S1.   | Hirshfeld surface of two ionic components mapped with $d_{\text{norm}}$ function on it and corresponding fingerprint plot for (I) – (III).  | 3    |
| Figure S2.   | The percentage contributions of various intermolecular close contacts to the Hirshfeld surface area of two ionic components of (I) – (III). | 3    |
| Figure S3.   | Diagrams of the total energy frameworks for 10 Å cluster of (I) – (III) (no energy threshold).                                              | 4    |
| Table S2.    | Final Cartesian coordinates for the gas-phase neutral pair of (I).                                                                          | 5    |
| Table S3.    | Final Cartesian coordinates for the gas-phase neutral pair of (II).                                                                         | 6    |
| Table S4.    | Final Cartesian coordinates for the gas-phase neutral pair of (III).                                                                        | 7    |

**Table S1.** Geometry of C—H $\cdots\pi$ (arene) intermolecular interactions for (I) – (III).

| Interaction                                 | H $\cdots$ Cg [Å] | X $\cdots$ Cg [Å] | C—H $\cdots$ Cg [°] |
|---------------------------------------------|-------------------|-------------------|---------------------|
| (I)                                         |                   |                   |                     |
| C6—H6 $\cdots$ Cg3( $-x+1, -y+1, -z+1$ )    | 2.63              | 3.4343(13)        | 143                 |
| C10—H10 $\cdots$ Cg3( $-x+2, -y+2, -z+1$ )  | 2.74              | 3.5109(13)        | 138                 |
| C19—H19A $\cdots$ Cg2( $-x+2, -y+1, -z+1$ ) | 2.83              | 3.6385(13)        | 138                 |
| (II)                                        |                   |                   |                     |
| C6—H6 $\cdots$ Cg3( $-x, -y+1, -z$ )        | 2.75              | 3.4813(15)        | 134                 |
| C10—H10 $\cdots$ Cg3( $-x+1, -y+1, -z+1$ )  | 2.66              | 3.4616(15)        | 143                 |
| C19—H19B $\cdots$ Cg2( $-x, -y+1, -z+1$ )   | 2.88              | 3.7226(17)        | 145                 |
| (III)                                       |                   |                   |                     |
| C6—H6 $\cdots$ Cg3( $-x+1, -y+1, -z+1$ )    | 2.60              | 3.3852(15)        | 140                 |
| C10—H10 $\cdots$ Cg3( $-x, -y+2, -z+1$ )    | 2.80              | 3.5329(15)        | 135                 |

\* Cg – centroid of the ring.

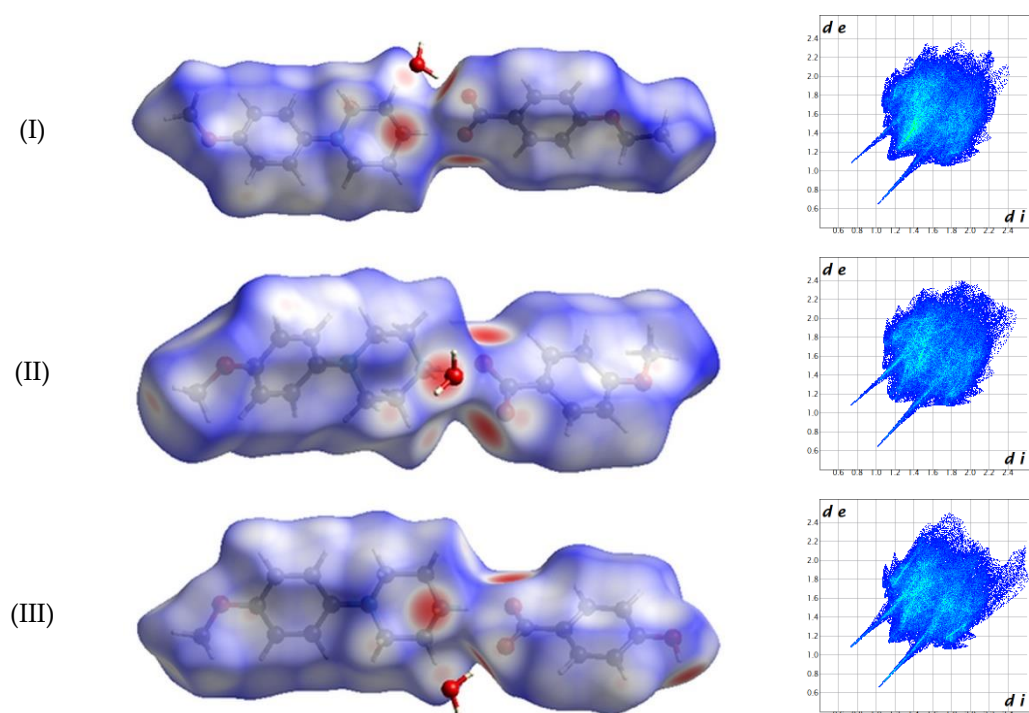

**Figure S1.** Hirshfeld surface of two ionic components mapped with  $d_{\text{norm}}$  function on it and corresponding fingerprint plot for (I) – (III). The distances from a surface to the nearest interior/exterior atoms ( $d_i$ ,  $d_e$ ) are given in Å.

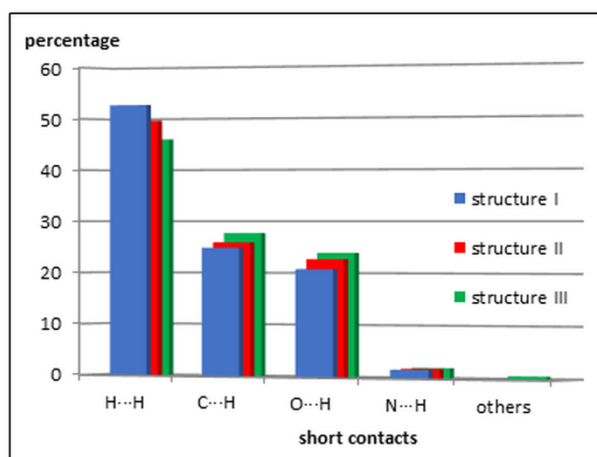

**Figure S2.** The percentage contributions of various intermolecular close contacts to the Hirshfeld surface area of two ionic components of (I) – (III).

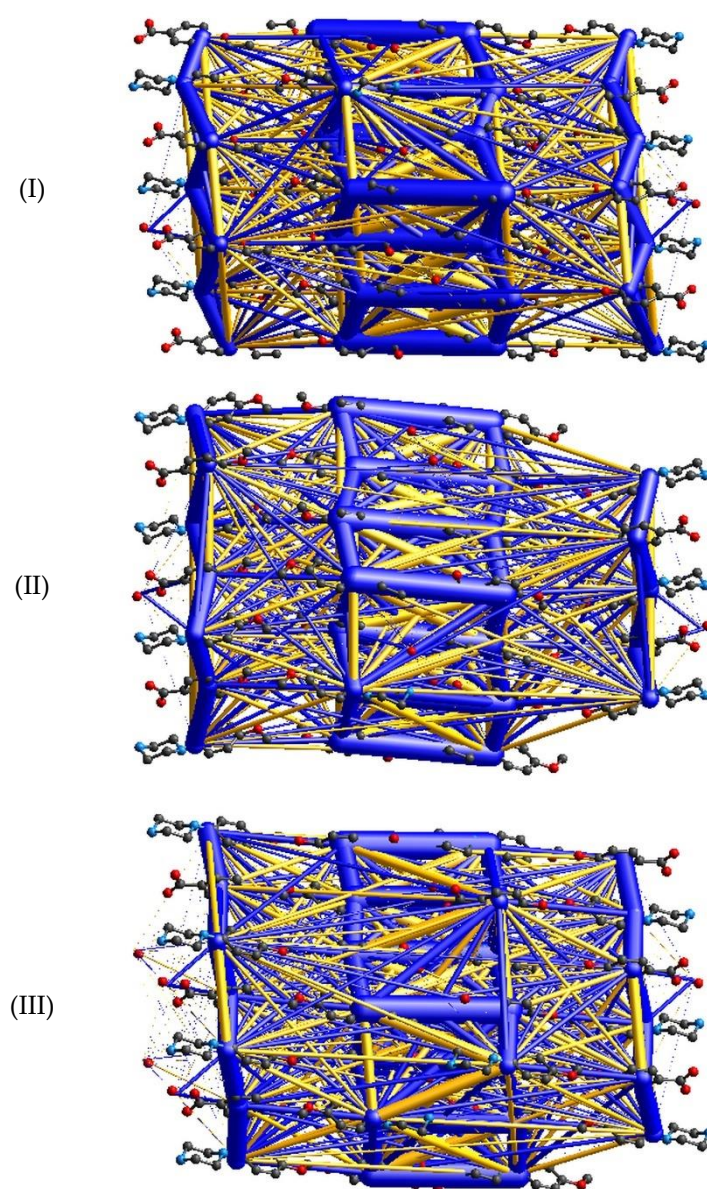

**Figure S3.** Diagrams of the total energy frameworks for 10 Å cluster of (I) – (III); drawn along the crystallographic *a* axis. All diagrams use the same energy tube scale factor of 20 (no energy threshold). The yellow cylinders represent destabilizing interactions.

**Table S2.** Final Cartesian coordinates (X, Y, Z in Å) for the gas-phase neutral pair of (I) optimized at the  $\omega$ B97XD/6-311++G(d,p) level of theory.

| Atom | X            | Y           | Z           |
|------|--------------|-------------|-------------|
| O    | -1.85482400  | 0.82116600  | 0.84306100  |
| O    | -2.07590100  | -1.16313200 | -0.16543300 |
| O    | -8.13180700  | 0.64756300  | 0.03635200  |
| C    | -4.03330600  | 0.09489100  | 0.22699500  |
| C    | -4.81813800  | -0.88353300 | -0.37271300 |
| H    | -4.34503400  | -1.77009900 | -0.77643500 |
| C    | -6.19771400  | -0.73752100 | -0.46098300 |
| H    | -6.78244900  | -1.51464400 | -0.93473900 |
| C    | -6.80278700  | 0.40582200  | 0.06234400  |
| C    | -6.01785800  | 1.39507600  | 0.66534400  |
| H    | -6.50913900  | 2.27412700  | 1.06453400  |
| C    | -4.65038500  | 1.23796400  | 0.74444700  |
| H    | -4.03307900  | 1.99710000  | 1.21004300  |
| C    | -2.55731000  | -0.03429400 | 0.33718200  |
| C    | -8.99876600  | -0.32057400 | -0.53573800 |
| H    | -8.87679200  | -1.27875000 | -0.01583400 |
| H    | -8.74313700  | -0.46877600 | -1.59227400 |
| C    | -10.41431300 | 0.19234200  | -0.39174800 |
| H    | -11.11685600 | -0.52849700 | -0.81691500 |
| H    | -10.53402000 | 1.14413600  | -0.91291700 |
| H    | -10.66221500 | 0.33984500  | 0.66121400  |
| O    | 8.78813600   | 1.00256400  | -0.12316400 |
| N    | 3.38541300   | -0.44184900 | -0.21711400 |
| N    | 0.56201900   | -0.79294300 | 0.22872000  |
| H    | 0.32724600   | -0.10684300 | 0.94464100  |
| H    | -1.07460000  | -1.15876100 | -0.04846400 |
| C    | 2.44092400   | 0.56182300  | -0.67971500 |
| H    | 2.81770300   | 1.00590800  | -1.60420000 |
| H    | 2.31270600   | 1.37493800  | 0.05968900  |
| C    | 1.08262900   | -0.07980400 | -0.94003100 |
| H    | 0.35489800   | 0.68247700  | -1.22741600 |
| H    | 1.17173200   | -0.79786700 | -1.76123000 |
| C    | 1.54429400   | -1.74670000 | 0.74289700  |
| H    | 1.65355400   | -2.54809400 | 0.00519500  |
| H    | 1.15928300   | -2.18687100 | 1.66587700  |
| C    | 2.90337100   | -1.10388700 | 0.99344700  |
| H    | 2.81853000   | -0.37587200 | 1.82212000  |
| H    | 3.61953000   | -1.86613900 | 1.30251400  |
| C    | 4.75265500   | -0.06345300 | -0.18414100 |
| C    | 5.73002200   | -1.05228900 | -0.08140800 |
| H    | 5.42977000   | -2.09392500 | -0.04987600 |
| C    | 7.08339100   | -0.74052300 | -0.04495000 |
| H    | 7.80365700   | -1.54456100 | 0.03320000  |
| C    | 7.49209900   | 0.58900300  | -0.13591200 |
| C    | 6.52846200   | 1.58554100  | -0.25510400 |
| H    | 6.85329300   | 2.61689800  | -0.32648200 |
| C    | 5.17963000   | 1.26599900  | -0.26853100 |
| H    | 4.45943000   | 2.07107800  | -0.34280700 |
| C    | 9.79362800   | 0.02636100  | 0.02109200  |
| H    | 10.74060800  | 0.56379200  | 0.01829000  |
| H    | 9.78424700   | -0.68860200 | -0.80991300 |
| H    | 9.69111400   | -0.51721000 | 0.96777700  |

**Table S3.** Final Cartesian coordinates (X, Y, Z in Å) for the gas-phase neutral pair of (II) optimized at the  $\omega$ B97XD/6-311++G(d,p) level of theory.

| Atom | X            | Y           | Z           |
|------|--------------|-------------|-------------|
| O    | -2.53825500  | -1.15223200 | 0.16552100  |
| O    | -2.31964900  | 0.82769000  | -0.85221400 |
| O    | -8.58272800  | 0.70230200  | 0.06554900  |
| C    | -4.49295700  | 0.11792000  | -0.19959000 |
| C    | -5.27355900  | -0.85194900 | 0.41891600  |
| H    | -4.79961900  | -1.73992500 | 0.81845900  |
| C    | -6.65027500  | -0.69494600 | 0.53145700  |
| H    | -7.23224500  | -1.46545600 | 1.01947200  |
| C    | -7.25526900  | 0.45045700  | 0.01402700  |
| C    | -6.47551700  | 1.43070800  | -0.60922500 |
| H    | -6.96769200  | 2.31126100  | -1.00387400 |
| C    | -5.11086400  | 1.26277900  | -0.71225600 |
| H    | -4.49652400  | 2.01481000  | -1.19303400 |
| C    | -3.01956800  | -0.02180900 | -0.33317700 |
| C    | -9.42942900  | -0.25519200 | 0.66543900  |
| H    | -9.18664600  | -0.39718100 | 1.72425400  |
| H    | -9.37394200  | -1.21801400 | 0.14593500  |
| H    | -10.43874900 | 0.14312100  | 0.57879500  |
| O    | 8.32515200   | 0.99059700  | 0.12074200  |
| N    | 2.91977900   | -0.44427100 | 0.20432200  |
| N    | 0.09686300   | -0.79242200 | -0.24663000 |
| H    | -1.53799300  | -1.15313400 | 0.03749500  |
| H    | -0.13552200  | -0.10843600 | -0.96530800 |
| C    | 2.43946300   | -1.10946600 | -1.00513700 |
| H    | 3.15513400   | -1.87381200 | -1.31013600 |
| H    | 2.35758400   | -0.38402100 | -1.83636500 |
| C    | 1.07882000   | -1.74939700 | -0.75559000 |
| H    | 0.69515400   | -2.19190800 | -1.67799500 |
| H    | 1.18514100   | -2.54857200 | -0.01506600 |
| C    | 0.61616900   | -0.07603500 | 0.92084300  |
| H    | 0.70236400   | -0.79153000 | 1.74458300  |
| H    | -0.11102200  | 0.68830500  | 1.20409600  |
| C    | 1.97598200   | 0.56253800  | 0.66134200  |
| H    | 1.85068300   | 1.37337800  | -0.08107900 |
| H    | 2.35140900   | 1.00913700  | 1.58514900  |
| C    | 4.28779800   | -0.06841000 | 0.17361700  |
| C    | 4.71673800   | 1.26063000  | 0.25428000  |
| H    | 3.99762300   | 2.06713700  | 0.32346900  |
| C    | 6.06611800   | 1.57789100  | 0.24365600  |
| H    | 6.39249700   | 2.60895200  | 0.31216100  |
| C    | 7.02841000   | 0.57928800  | 0.13105400  |
| C    | 6.61774000   | -0.74988300 | 0.04371300  |
| H    | 7.33695700   | -1.55534400 | -0.02933800 |
| C    | 5.26374600   | -1.05927300 | 0.07732300  |
| H    | 4.96177400   | -2.10050700 | 0.04881800  |
| C    | 9.32949000   | 0.01216700  | -0.01643500 |
| H    | 9.22921900   | -0.53485000 | -0.96137000 |
| H    | 9.31621100   | -0.69957900 | 0.81728100  |
| H    | 10.27733200  | 0.54806100  | -0.01255900 |

**Table S4.** Final Cartesian coordinates (X, Y, Z in Å) for the gas-phase neutral pair of (III) optimized at the  $\omega$ B97XD/6-311++G(d,p) level of theory.

| Atom | X           | Y           | Z           |
|------|-------------|-------------|-------------|
| O    | 7.88188300  | 1.02830700  | 0.06166400  |
| N    | 2.48756500  | -0.44182300 | 0.20959500  |
| N    | -0.33601000 | -0.81550600 | -0.21551900 |
| H    | -1.96027700 | -1.18380300 | 0.09357000  |
| H    | -0.57993700 | -0.14486200 | -0.94293900 |
| C    | 1.54065400  | 0.56527800  | 0.65889600  |
| H    | 1.40452600  | 1.36486600  | -0.09384400 |
| H    | 1.91975600  | 1.02726200  | 1.57359000  |
| C    | 0.18732500  | -0.07873700 | 0.93748800  |
| H    | 0.28455100  | -0.78179900 | 1.77061300  |
| H    | -0.54284400 | 0.68451700  | 1.21620000  |
| C    | 0.64868000  | -1.77303600 | -0.71856600 |
| H    | 0.26124000  | -2.23009100 | -1.63220400 |
| H    | 0.76539400  | -2.56162100 | 0.03166300  |
| C    | 2.00316600  | -1.12754000 | -0.98667000 |
| H    | 2.72195100  | -1.89140600 | -1.28553500 |
| H    | 1.91073300  | -0.41477600 | -1.82773100 |
| C    | 3.85282100  | -0.05691400 | 0.16270800  |
| C    | 4.83478200  | -1.04289000 | 0.07919100  |
| H    | 4.53953100  | -2.08643600 | 0.07358000  |
| C    | 6.18637500  | -0.72515000 | 0.03030300  |
| H    | 6.91054400  | -1.52706000 | -0.03170900 |
| C    | 6.58828600  | 0.60830400  | 0.08878000  |
| C    | 5.61986000  | 1.60242500  | 0.18848200  |
| H    | 5.93959600  | 2.63680700  | 0.23460400  |
| C    | 4.27281000  | 1.27633500  | 0.21455500  |
| H    | 3.54866600  | 2.07915600  | 0.27329100  |
| C    | 8.89253100  | 0.05422300  | -0.05967800 |
| H    | 8.88755000  | -0.64020700 | 0.78861100  |
| H    | 9.83660400  | 0.59662600  | -0.07089800 |
| H    | 8.79236800  | -0.51278600 | -0.99275000 |
| O    | -2.78161700 | 0.74751700  | -0.87068200 |
| O    | -2.95854400 | -1.18510500 | 0.24204300  |
| O    | -9.01973300 | 0.50577500  | 0.34147300  |
| H    | -9.33682100 | 1.30589700  | -0.08096500 |
| C    | -4.93028500 | 0.05674200  | -0.12177900 |
| C    | -5.56637800 | 1.16467600  | -0.67676800 |
| H    | -4.97180000 | 1.88914200  | -1.22054700 |
| C    | -6.93364900 | 1.33638700  | -0.53699700 |
| H    | -7.42256700 | 2.20226100  | -0.97381400 |
| C    | -7.67913200 | 0.39227000  | 0.16826700  |
| C    | -7.05349100 | -0.72000200 | 0.72800900  |
| H    | -7.65188500 | -1.43978800 | 1.27295900  |
| C    | -5.68747900 | -0.88345800 | 0.58012700  |
| H    | -5.19474000 | -1.74552100 | 1.01197000  |
| C    | -3.46002700 | -0.08175100 | -0.29338800 |
