# Supplementary material for: Hydrogen-Bonded Chain of Rings Motif in N-(4-Methoxyphenyl)piperazin-1-ium Salts with Benzoate Anions: Supramolecular Assemblies and Their Energy Frameworks
Source: MDPI journal article supplement (doi:10.3390/cryst12121807), 2022-12-12
Supplement: s1 [file s1]

Sample Code: DIV-3

Solvent: dms

SA-AGILENT 400MHz NMR

Date: Jul 28 2022

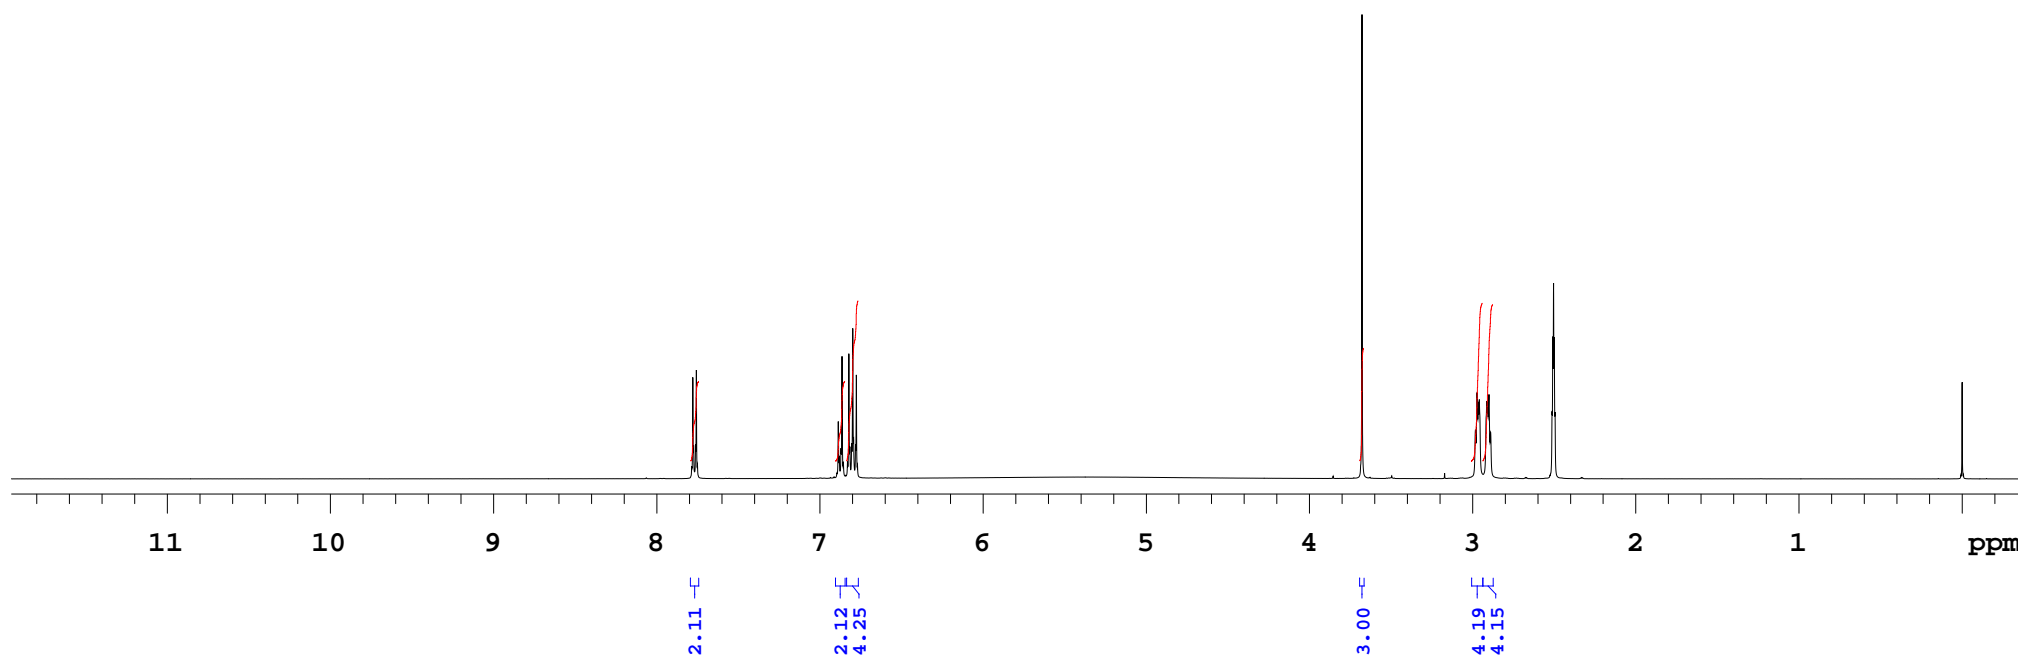

Plotname: DIV-3\_PROTON\_20220728\_01\_plot01

Sample Code: DIV-3

Solvent: dms

SA-AGILENT 400MHz NMR

Date: Jul 28 2022

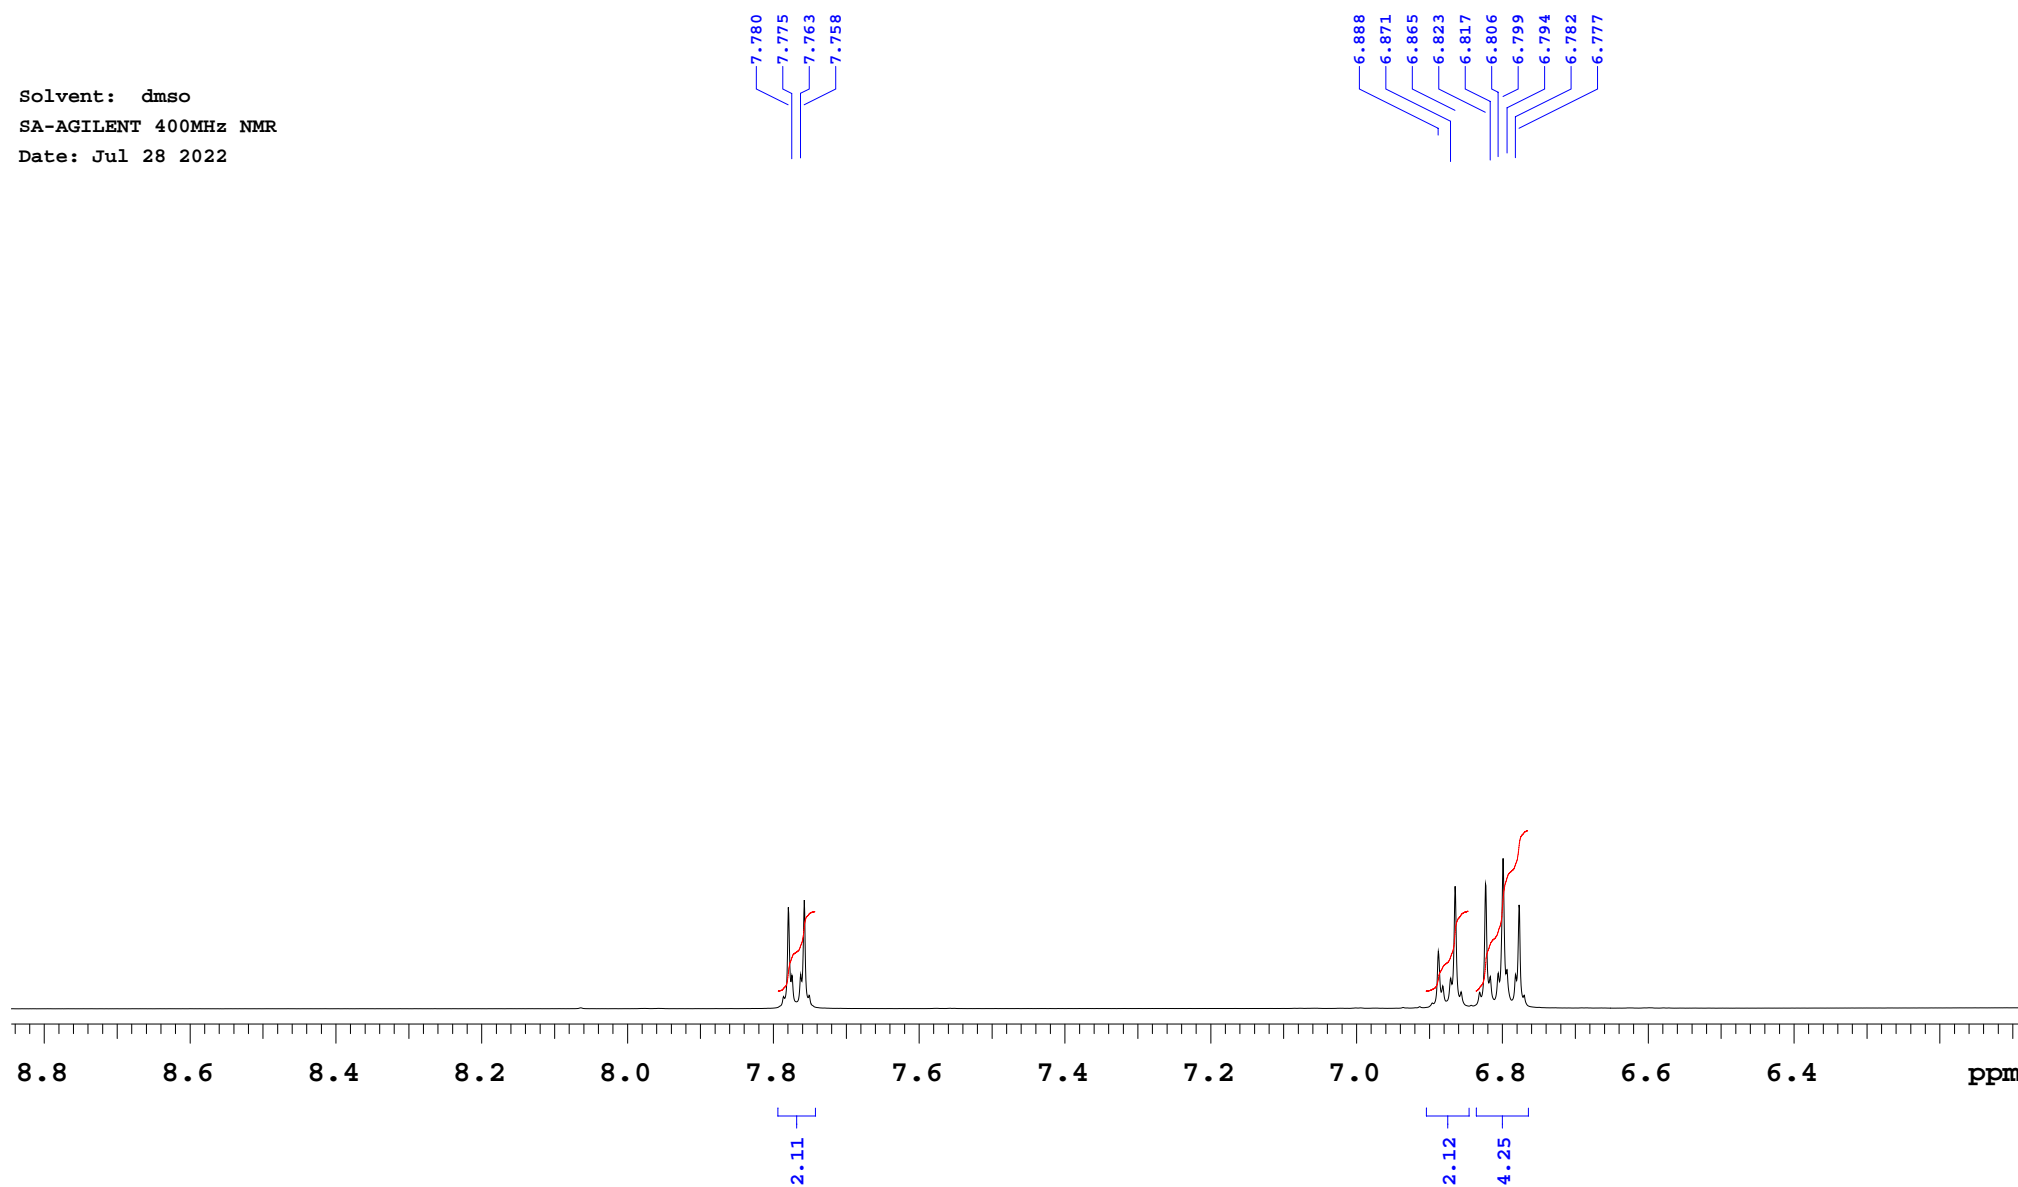

Plotname: DIV-3\_PROTON\_20220728\_01\_plot02

Sample Code: DIV-3

Solvent: dmsO

SA-AGILENT 400MHz NMR

Date: Jul 28 2022

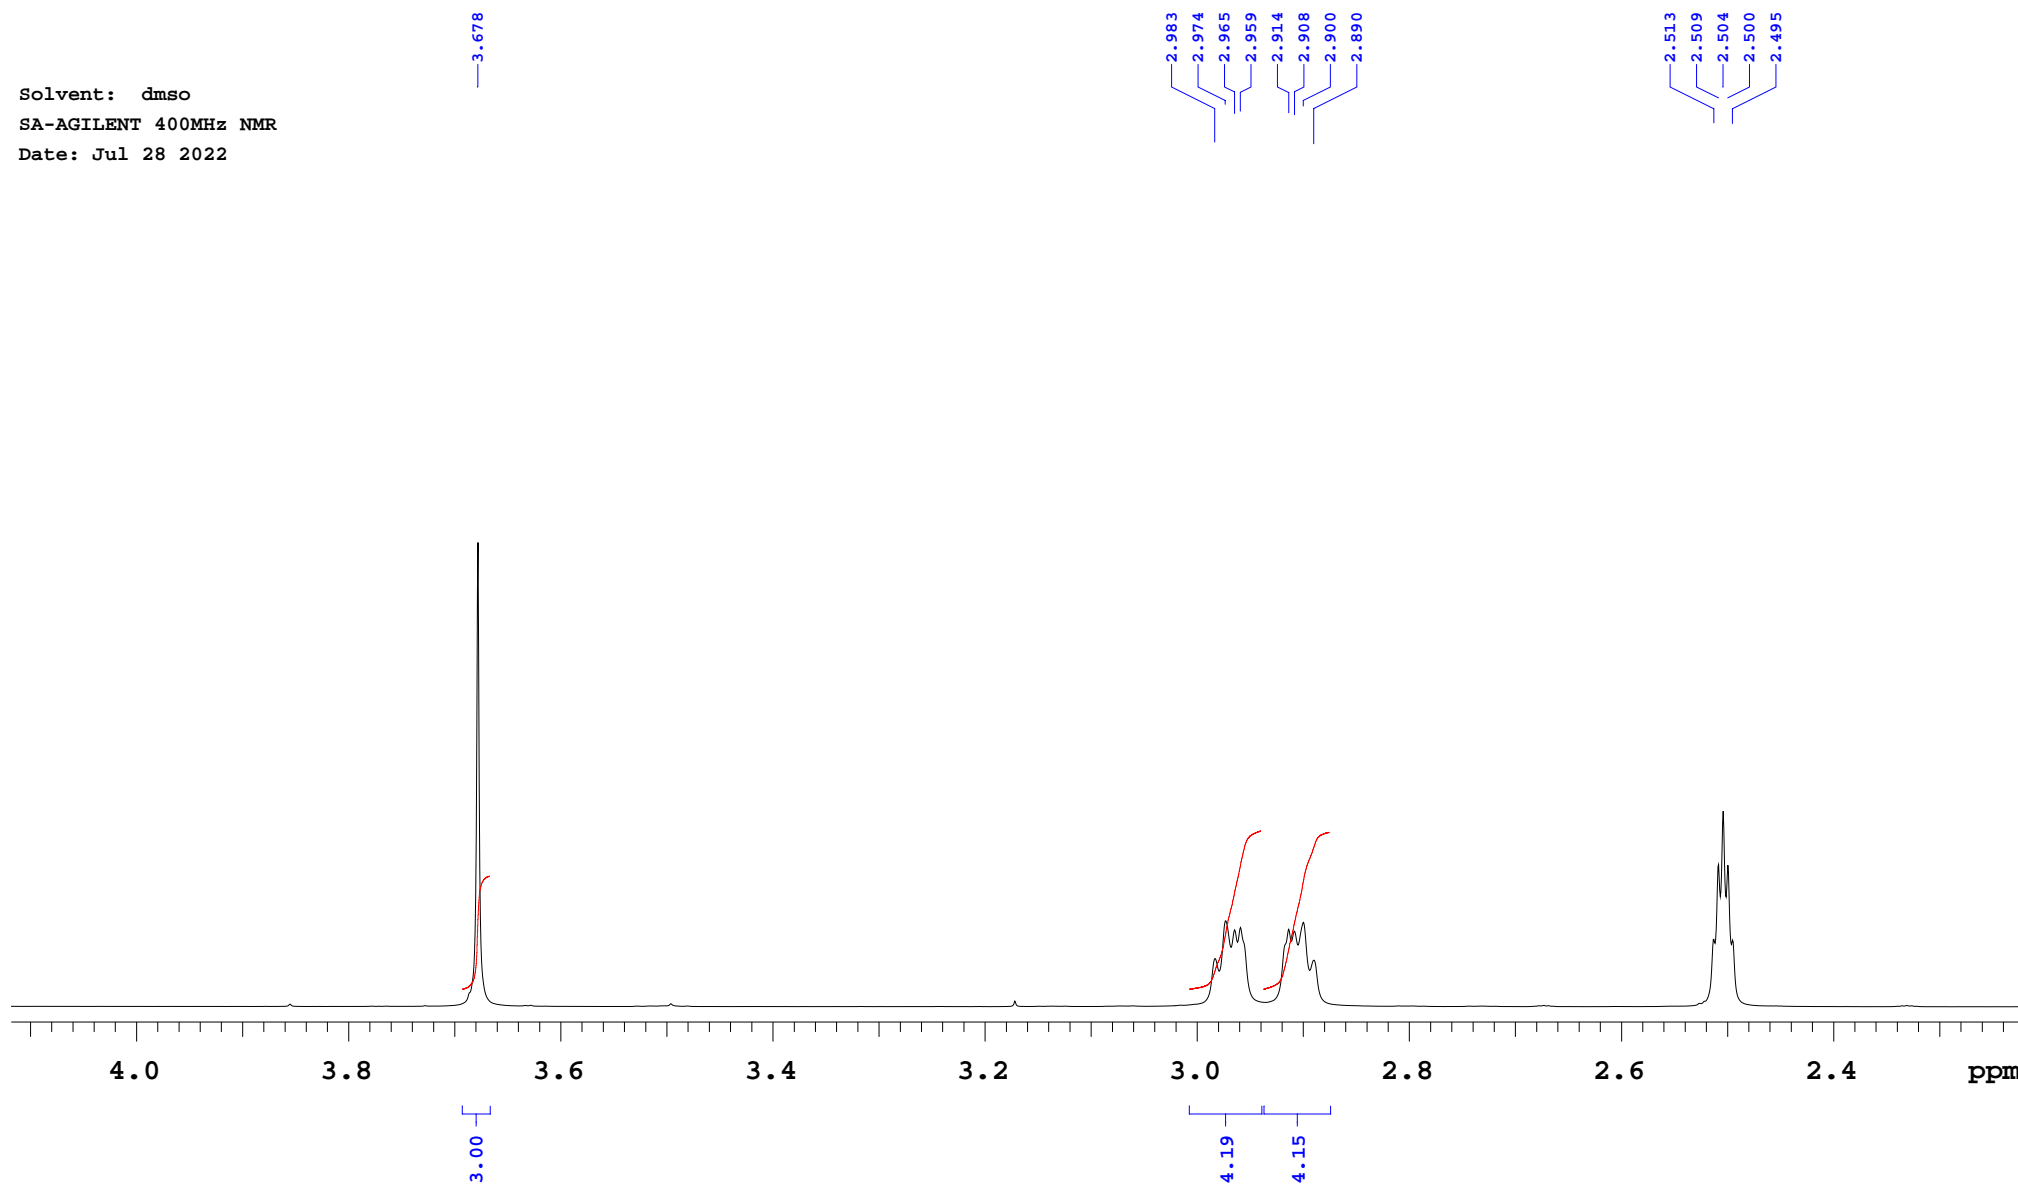

Plotname: DIV-3\_PROTON\_20220728\_01\_plot03

expl PROTON

```

      SAMPLE      PRESATURATION
date   Jul 28 2022  satmode      n
solvent  dmsso  wet      n
file /home/spark-d~ SPECIAL
d2/data/2022/Jul/D~ temp      not used
IV-3_20220728_01/D~ gain      38
IV-3_PROTON_202207~ spin      20
      28_01.fid  hst      0.008
      ACQUISITION  pw90      12.000
sw      7183.9  alfa      10.000
at      4.000      FLAGS
np      57472  il      n
fb      4000  in      n
bs      2  dp      y
dl      1.000  hs      nn
nt      512      PROCESSING
ct      18  lb      0.50
      TRANSMITTER  fn      not used
tn      H1      DISPLAY
sfrq      399.837  sp      -779.2
tof      799.6  wp      7183.7
tpwr      61  rfl      779.4
pw      6.000  rfp      0
      DECOUPLER  rp      -31.3
dn      C13  lp      0
dof      0      PLOT
dm      nnn  wc      268
decwave W40_ATB-89~ sc      0
      85  vs      59
dpwr      39  th      3
dmf      29412  ai  ph
```

| INDEX | FREQUENCY | PPM   | HEIGHT |
|-------|-----------|-------|--------|
| 1     | 3110.5    | 7.780 | 13.4   |
| 2     | 3108.5    | 7.775 | 4.5    |
| 3     | 3103.7    | 7.763 | 4.6    |
| 4     | 3101.7    | 7.758 | 14.4   |
| 5     | 2754.0    | 6.888 | 7.6    |
| 6     | 2751.6    | 6.882 | 3.1    |
| 7     | 2747.2    | 6.871 | 4.1    |
| 8     | 2744.8    | 6.865 | 16.2   |
| 9     | 2728.2    | 6.823 | 16.6   |
| 10    | 2725.5    | 6.817 | 4.3    |
| 11    | 2721.2    | 6.806 | 4.7    |
| 12    | 2718.5    | 6.799 | 19.9   |
| 13    | 2716.3    | 6.794 | 5.2    |
| 14    | 2711.7    | 6.782 | 4.6    |
| 15    | 2709.8    | 6.777 | 13.8   |
| 16    | 1470.6    | 3.678 | 61.4   |
| 17    | 1192.9    | 2.983 | 6.4    |
| 18    | 1188.9    | 2.974 | 11.4   |
| 19    | 1185.4    | 2.965 | 10.2   |
| 20    | 1183.2    | 2.959 | 10.5   |
| 21    | 1165.0    | 2.914 | 10.3   |
| 22    | 1162.8    | 2.908 | 10.0   |
| 23    | 1159.5    | 2.900 | 11.2   |
| 24    | 1155.6    | 2.890 | 6.2    |
| 25    | 1004.8    | 2.513 | 8.9    |
| 26    | 1003.0    | 2.509 | 18.8   |
| 27    | 1001.2    | 2.504 | 25.9   |
| 28    | 999.5     | 2.500 | 18.7   |
| 29    | 997.7     | 2.495 | 8.8    |
| 30    | 0.0       | 0.000 | 12.8   |
