# Supplementary material for: Hydrogen-Bonded Chain of Rings Motif in N-(4-Methoxyphenyl)piperazin-1-ium Salts with Benzoate Anions: Supramolecular Assemblies and Their Energy Frameworks
Source: MDPI journal article supplement (doi:10.3390/cryst12121807), 2022-12-12
Supplement: s1 [file s1]

D2

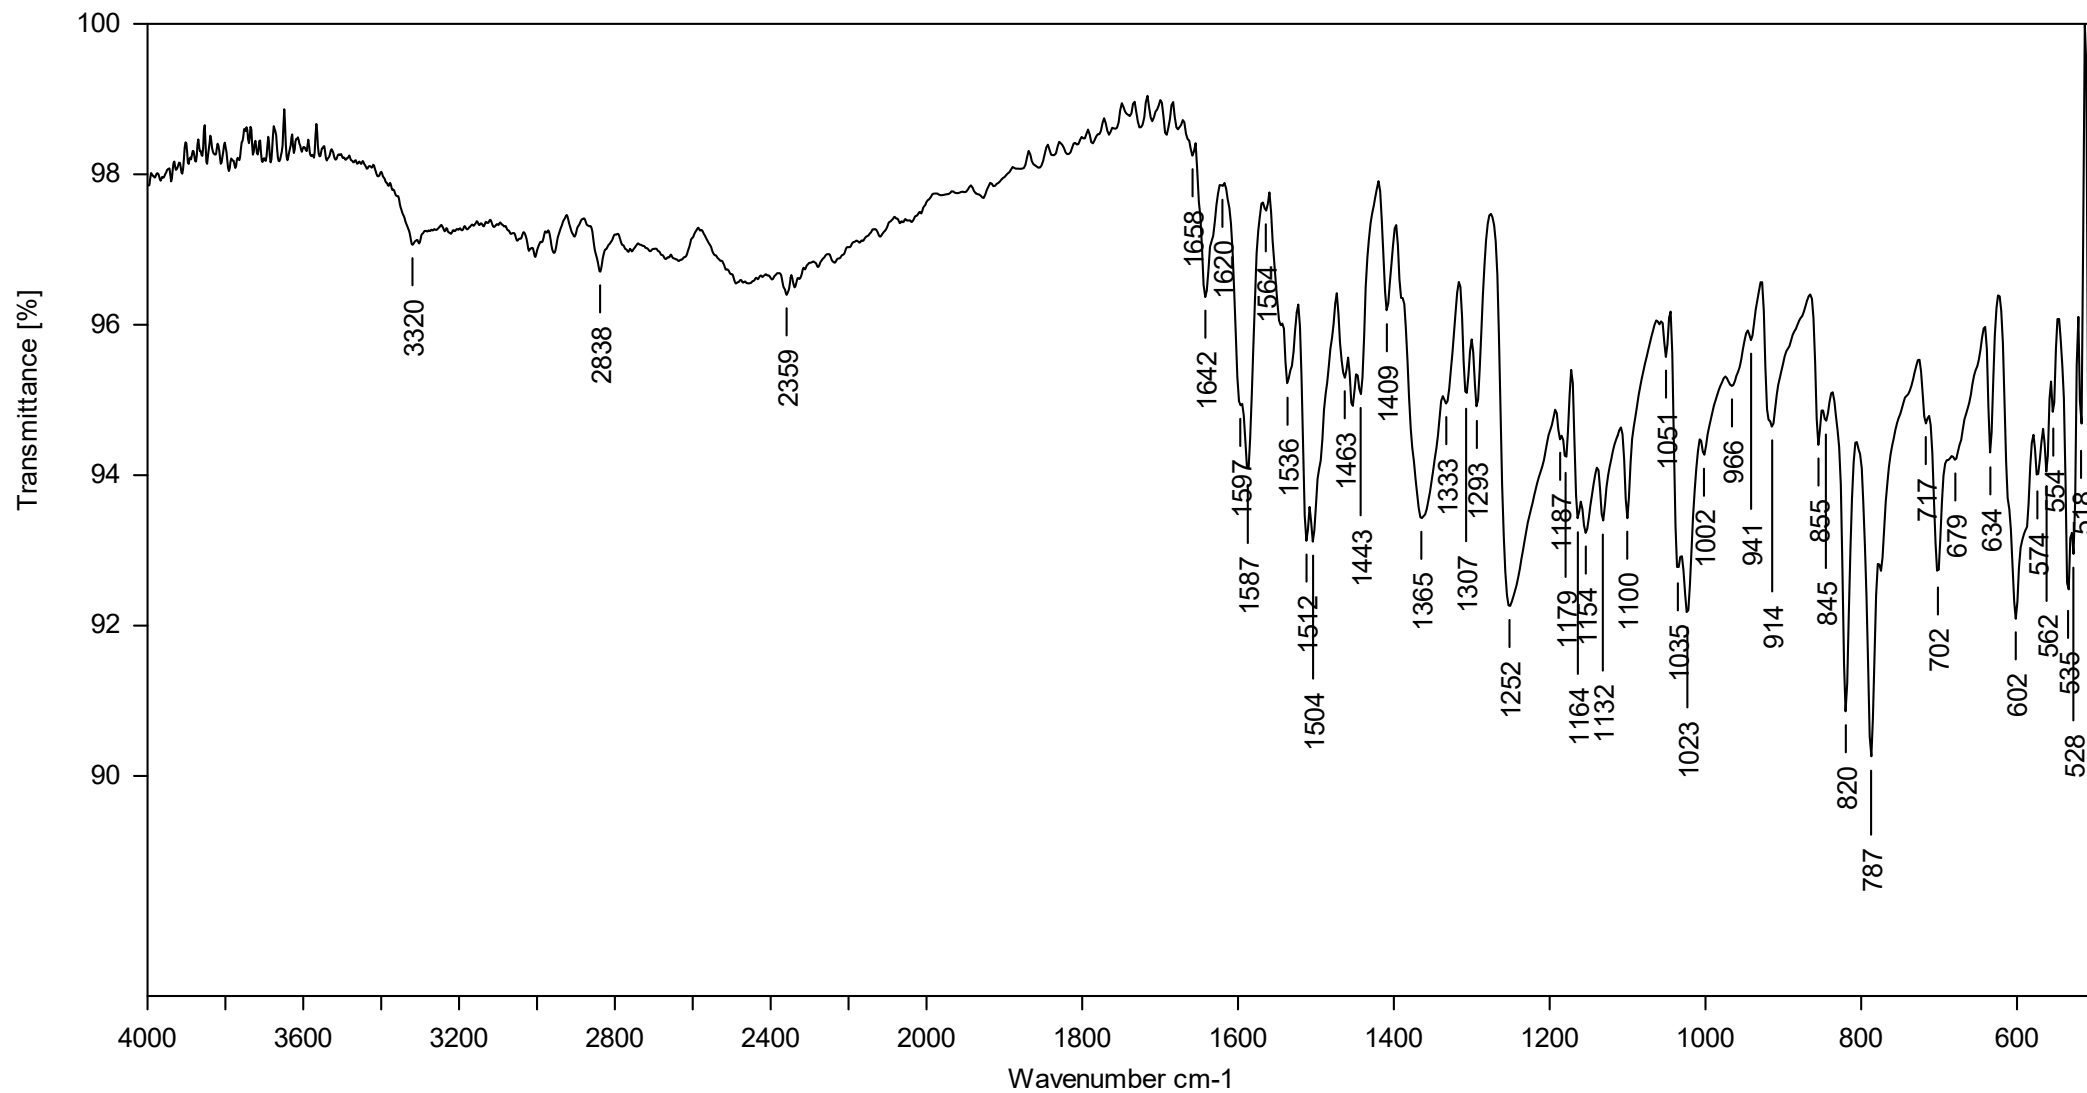

Experiment ATR\_ZnSe1.XPM

Operator Name Admin

Instrument Type Alpha II

Resolution 4

Path of File C:\PRL

Date of Measurement 18-07-2022

Sample Form Solid

Sample Scans 32
