# Supplementary material for: Hydrogen-Bonded Chain of Rings Motif in N-(4-Methoxyphenyl)piperazin-1-ium Salts with Benzoate Anions: Supramolecular Assemblies and Their Energy Frameworks
Source: MDPI journal article supplement (doi:10.3390/cryst12121807), 2022-12-12
Supplement: s1 [file s1]

Sample Code: D2

Solvent: CD3OD

SA-Varian 400MHz NMR

Date: Jul 18 2022

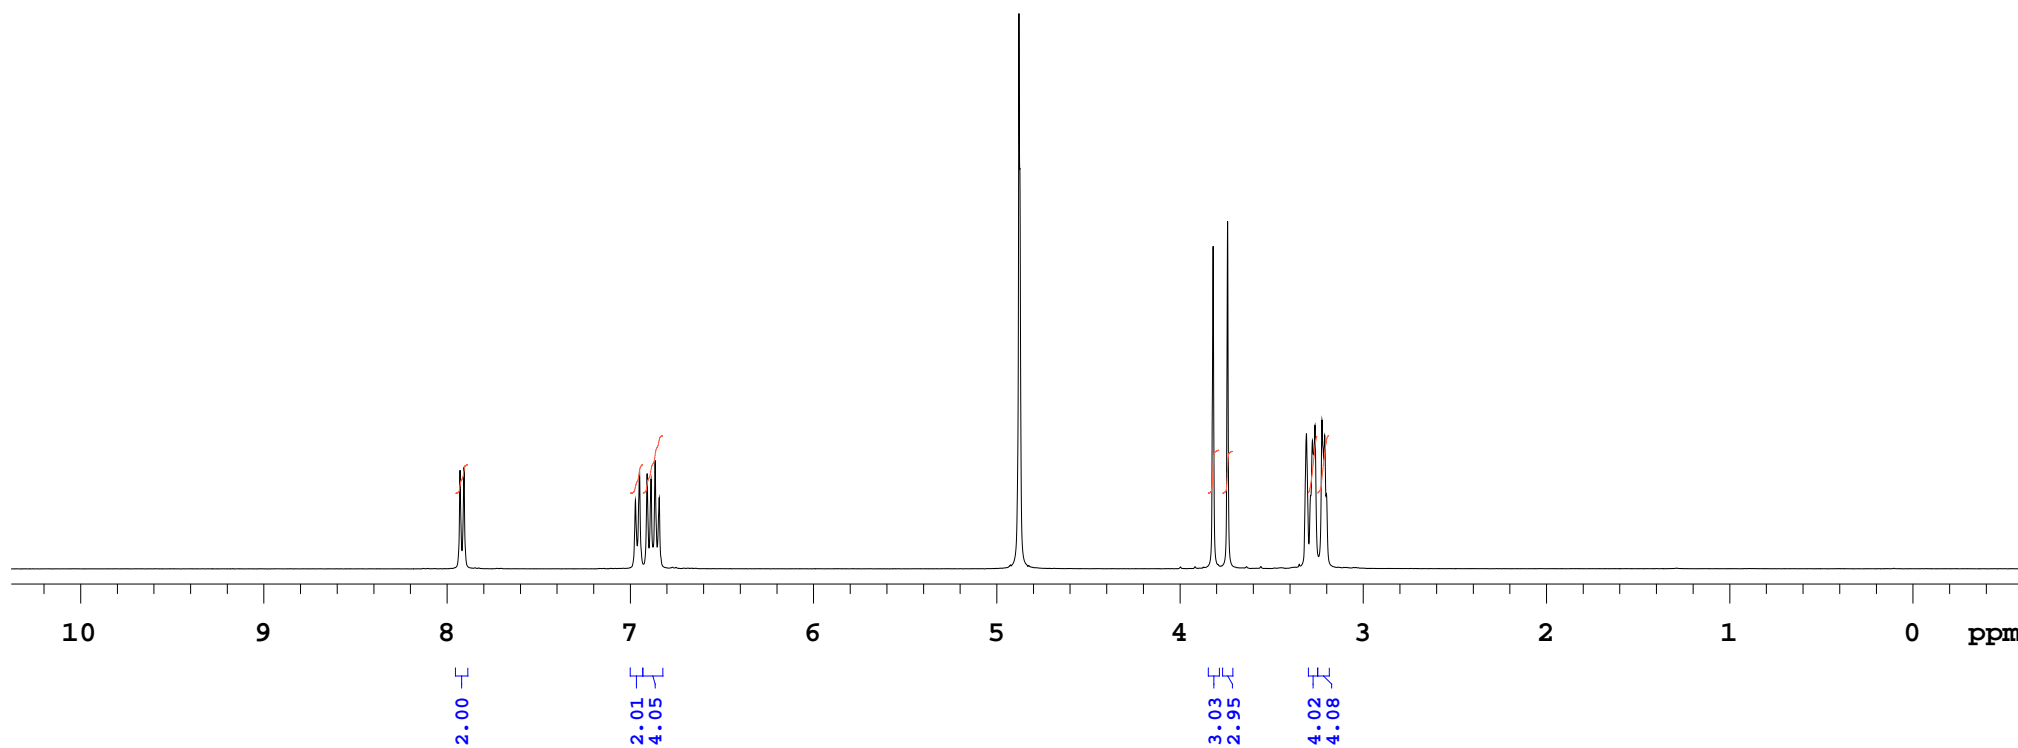

Plotname: D2\_PROTON\_20220718\_01\_plot01

Sample Code: D2

Solvent: CD3OD

SA-Varian 400MHz NMR

Date: Jul 18 2022

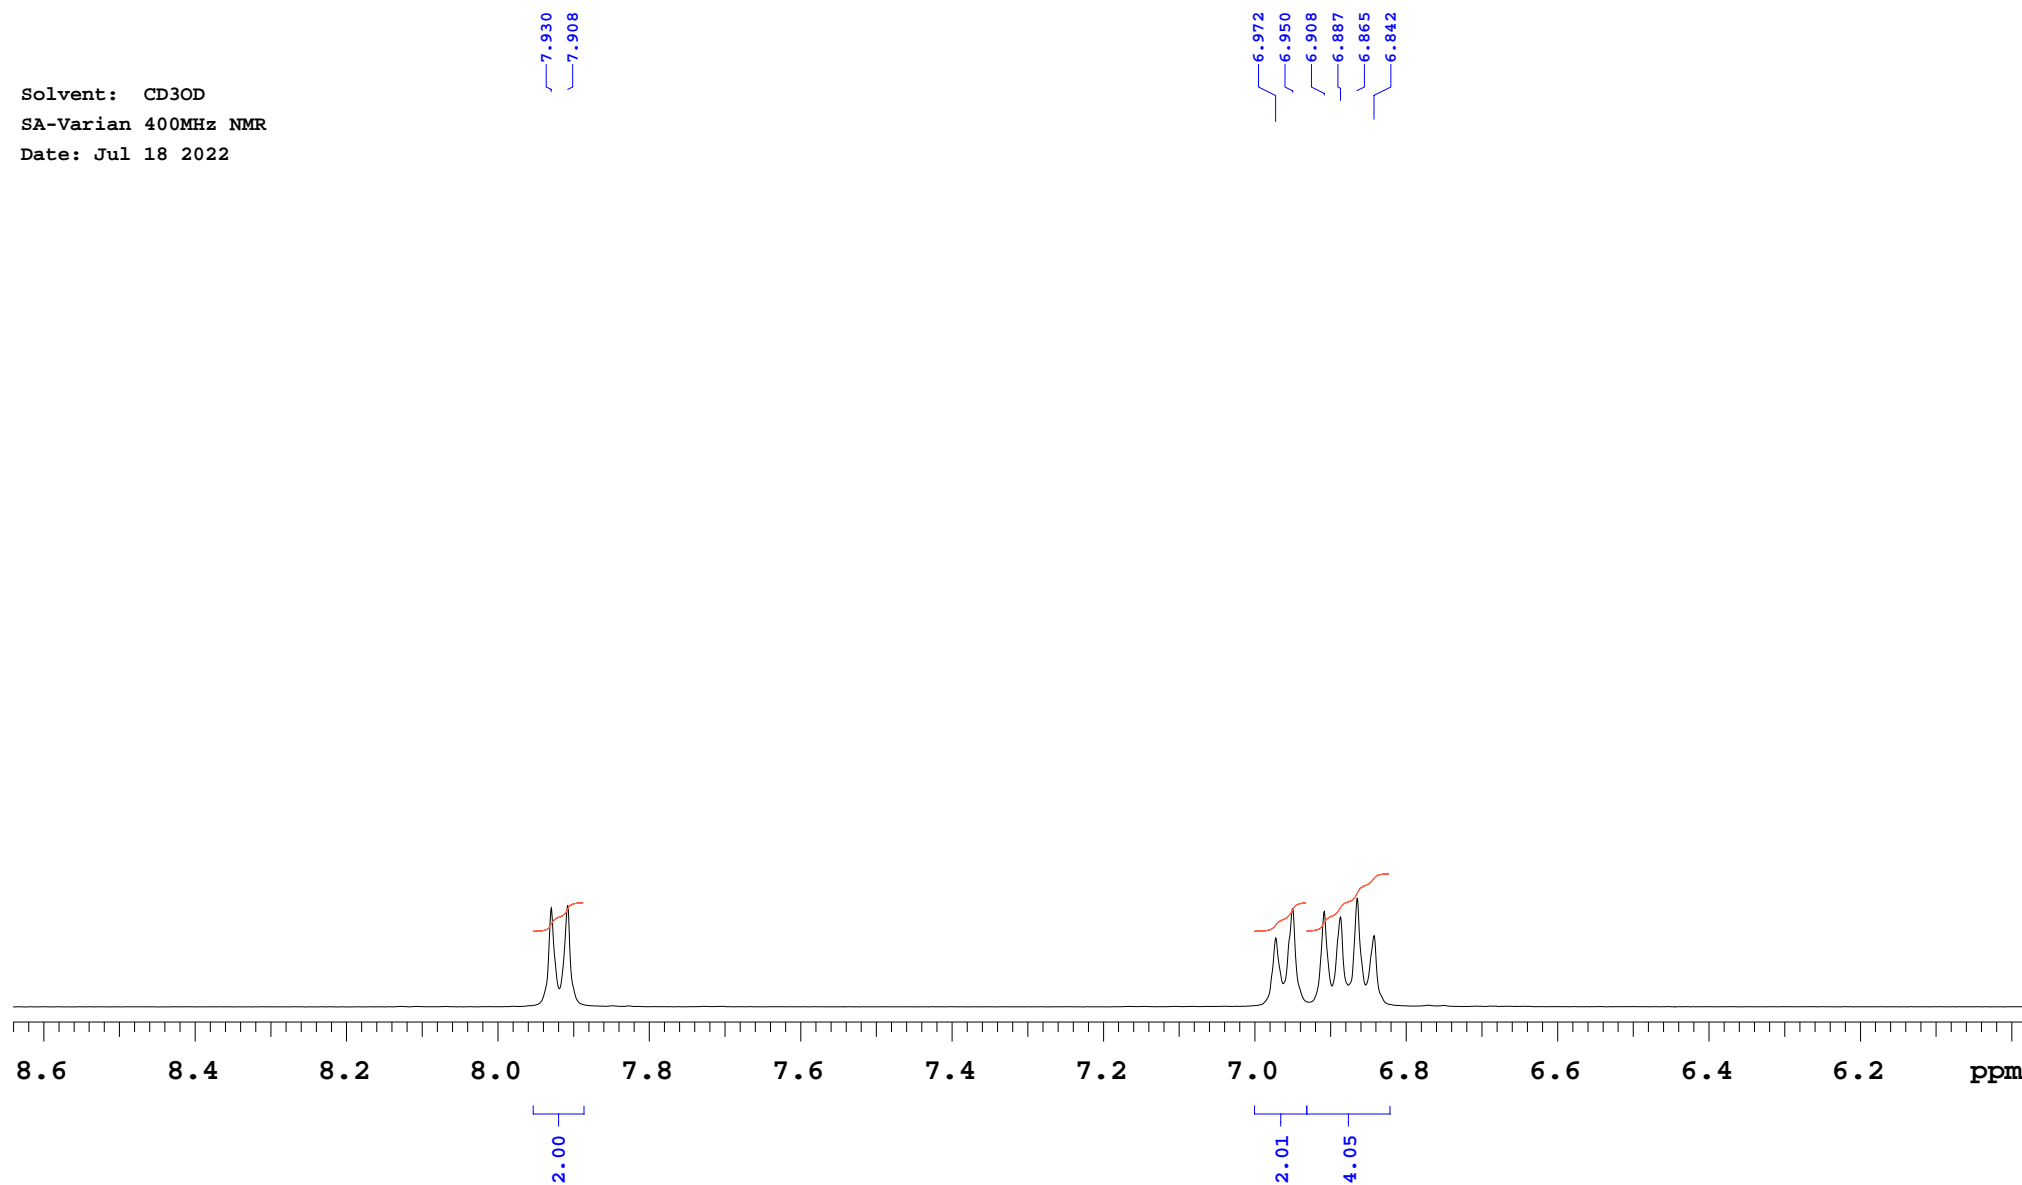

Plotname: D2\_PROTON\_20220718\_01\_plot02

Sample Code: D2

Solvent: CD3OD

SA-Varian 400MHz NMR

Date: Jul 18 2022

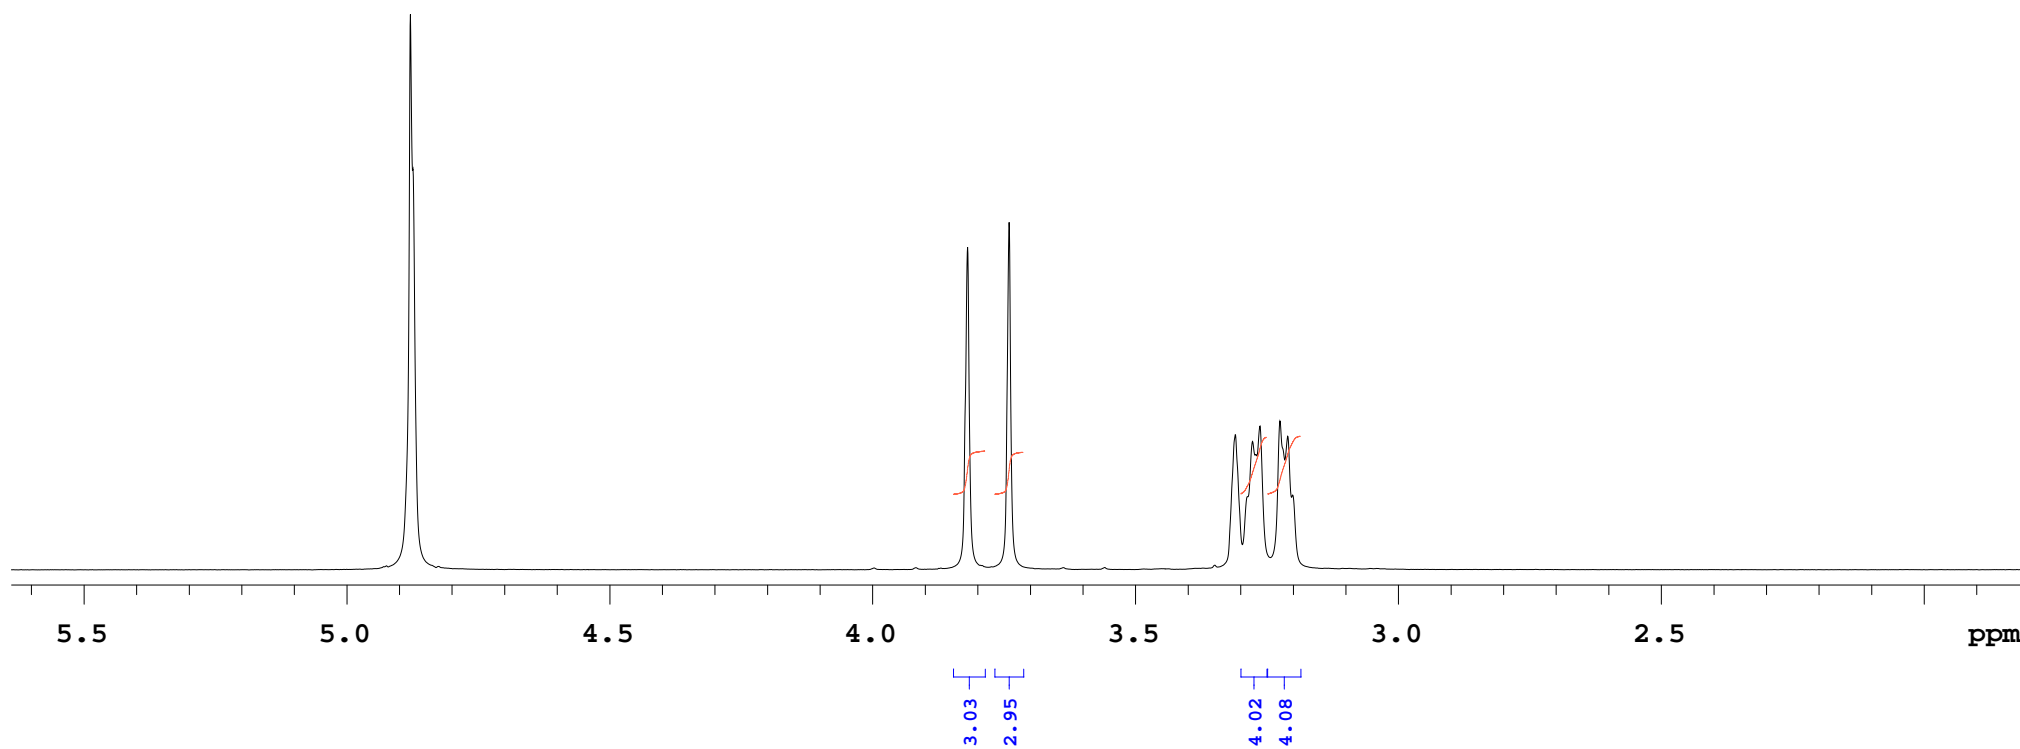

Plotname: D2\_PROTON\_20220718\_01\_plot03

Sample Code: D2

Solvent: CD3OD

SA-Varian 400MHz NMR

Date: Jul 18 2022

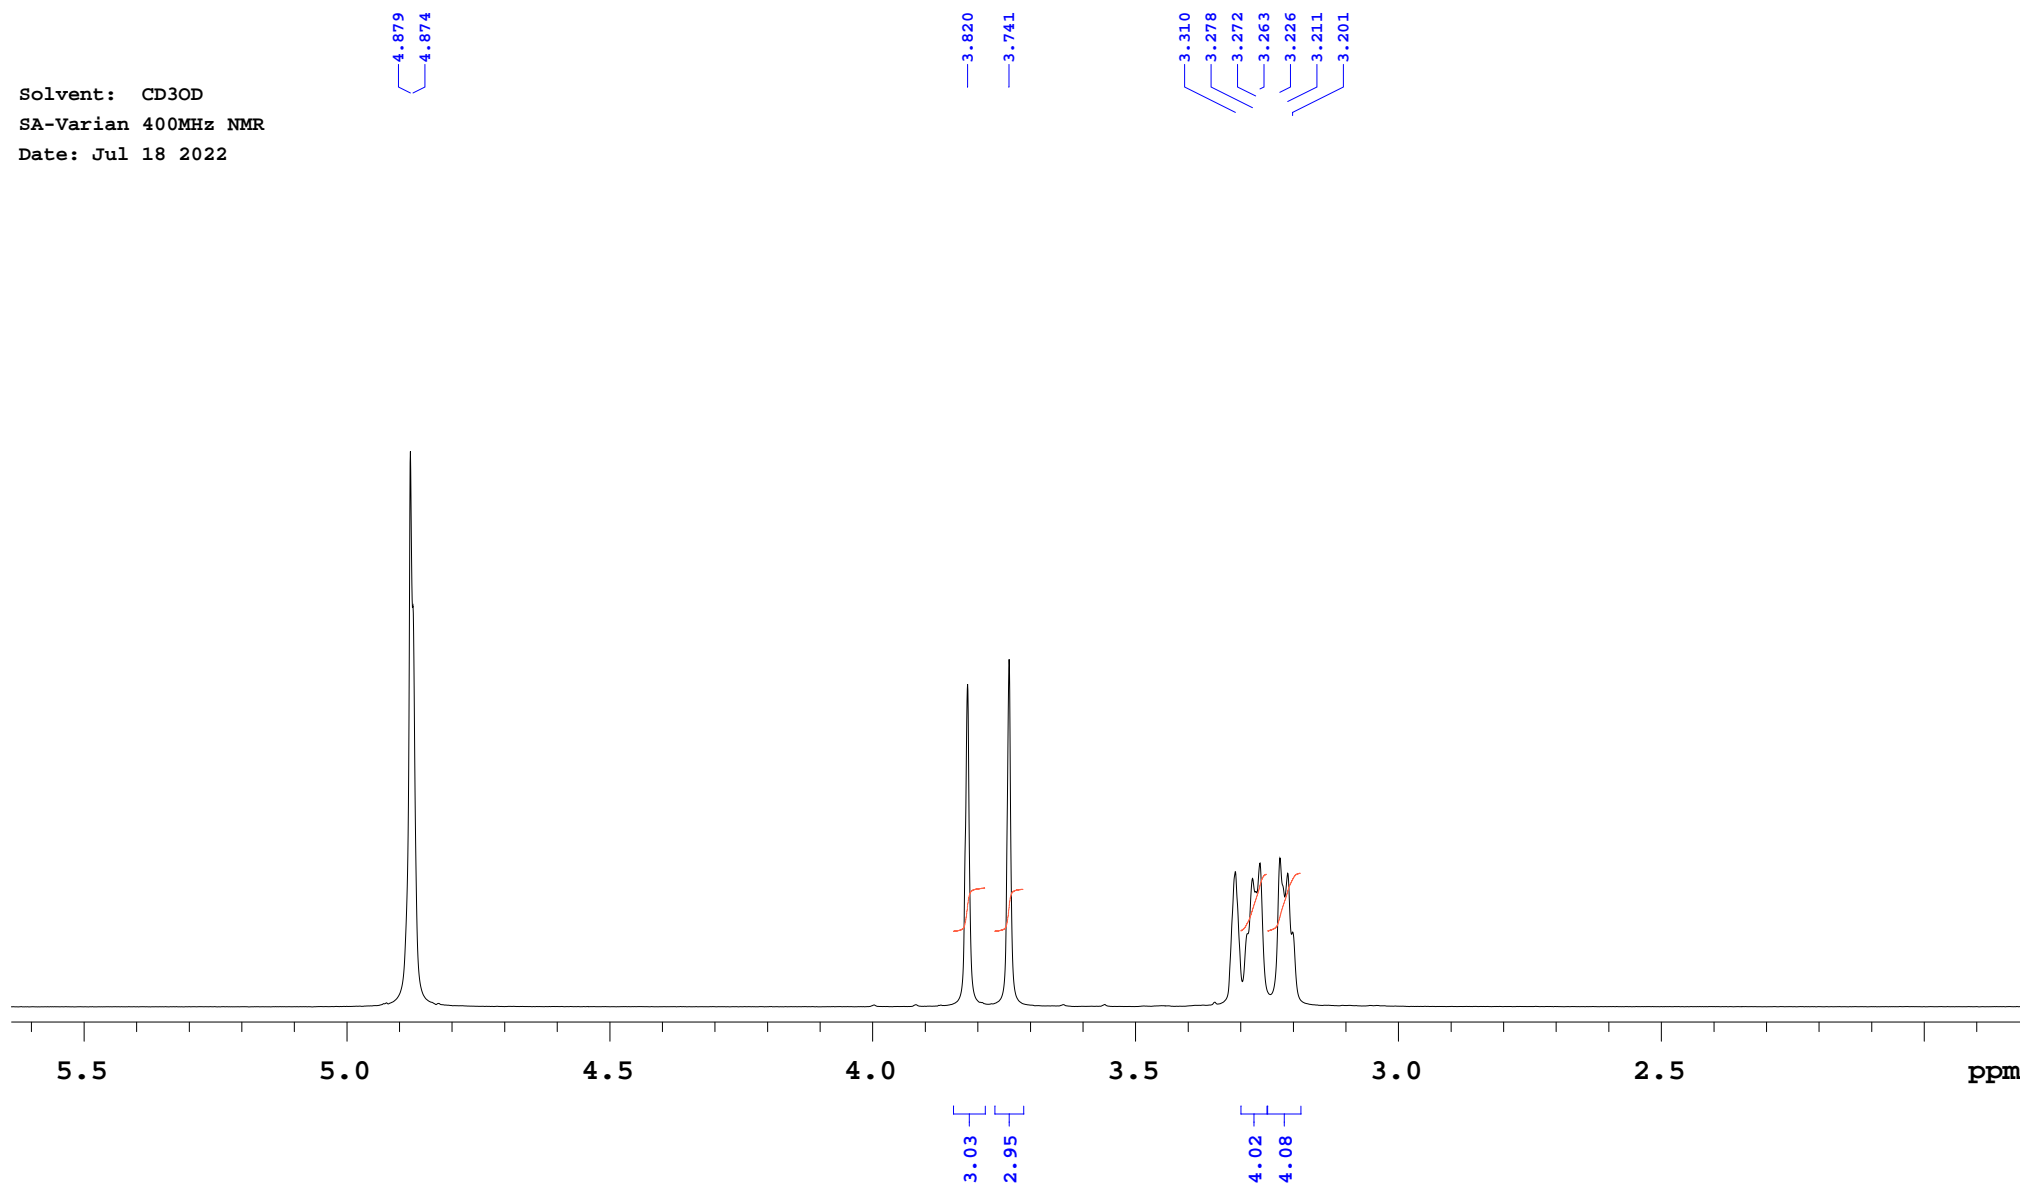

Plotname: D2\_PROTON\_20220718\_01\_plot04

expl PROTON

| SAMPLE              |                | PRESATURATION |          |
|---------------------|----------------|---------------|----------|
| date                | Jul 18 2022    | satmode       | n        |
| solvent             | CD3OD          | wet           | n        |
| file                | /home/spark/d~ | SPECIAL       |          |
| ata/2022/Jul/D2_20~ | temp           |               | 25.0     |
| 220718_01/D2_PROTO~ | gain           |               | 36       |
| N_20220718_01.fid   | spin           |               | 20       |
| ACQUISITION         | hst            |               | 0.008    |
| sw                  | 7183.9         | pw90          | 12.200   |
| at                  | 4.000          | alfa          | 10.000   |
| np                  | 57472          | FLAGS         |          |
| fb                  | 4000           | il            | n        |
| bs                  | 2              | in            | n        |
| d1                  | 1.000          | dp            | y        |
| nt                  | 512            | hs            | nn       |
| ct                  | 14             | PROCESSING    |          |
| TRANSMITTER         | lb             |               | 0.50     |
| tn                  | H1             | fn            | not used |
| sfrq                | 399.691        | DISPLAY       |          |
| tof                 | 799.3          | sp            | -791.1   |
| tpwr                | 61             | wp            | 7183.7   |
| pw                  | 6.100          | rfl           | 2114.3   |
| DECOUPLER           | rfp            |               | 1323.0   |
| dn                  | C13            | rp            | -31.2    |
| dof                 | 0              | lp            | 0        |
| dm                  | nnn            | PLOT          |          |
| decwave W40_GATB-0~ | wc             |               | 268      |
|                     | 12             | sc            | 0        |
| dpwr                | 34             | vs            | 109      |
| dmf                 | 29412          | th            | 3        |
|                     | ai             | cdc           | ph       |

Plotname: D2\_PROTON\_20220718\_01\_plot05

Sample Code: D2

Solvent: CD3OD

SA-Varian 400MHz NMR

Date: Jul 18 2022

| INDEX | FREQUENCY | PPM   | HEIGHT |
|-------|-----------|-------|--------|
| 1     | 3169.4    | 7.930 | 13.1   |
| 2     | 3160.6    | 7.908 | 13.4   |
| 3     | 2786.8    | 6.972 | 9.1    |
| 4     | 2777.8    | 6.950 | 13.0   |
| 5     | 2761.2    | 6.908 | 12.6   |
| 6     | 2752.6    | 6.887 | 11.9   |
| 7     | 2743.8    | 6.865 | 14.3   |
| 8     | 2734.8    | 6.842 | 9.4    |
| 9     | 1950.2    | 4.879 | 73.5   |
| 10    | 1948.2    | 4.874 | 53.0   |
| 11    | 1526.6    | 3.820 | 42.7   |
| 12    | 1495.1    | 3.741 | 46.0   |
| 13    | 1323.0    | 3.310 | 17.9   |
| 14    | 1310.0    | 3.278 | 17.0   |
| 15    | 1307.6    | 3.272 | 15.3   |
| 16    | 1304.3    | 3.263 | 19.0   |
| 17    | 1289.2    | 3.226 | 19.7   |
| 18    | 1283.3    | 3.211 | 17.7   |
| 19    | 1279.6    | 3.201 | 9.9    |

Plotname: D2\_PROTON\_20220718\_01\_plot06
